# Supplementary material for: Vapor flux and recrystallization during dry snow metamorphism under a steady temperature gradient as observed by time-lapse micro-tomography
Source: Copernicus journal article supplement (doi:10.5194/tc-6-1141-2012), 2012-10-16
Supplement: Supplementary file 1 [file tc-6-1141-2012-supplement.zip]

Archive with 5 entries (5 files):
- tcd-2012-0040-fS01.pdf
- tcd-2012-0040-fS02.pdf
- captions_supplementary_figures.txt
- ../movie1_mq.mov
- movie1_mq.mov
