# Supplementary material for: Vapor flux and recrystallization during dry snow metamorphism under a steady temperature gradient as observed by time-lapse micro-tomography
Source: Copernicus journal article supplement (doi:10.5194/tc-6-1141-2012), 2012-10-16
Supplement: Supplementary file 1 [file tc-6-1141-2012-supplement.zip › captions_supplementary_figures.txt]

Figure S01: Evolution of the volumetric density (ice fraction) of the three
series. Dotted lines represent mean values as given in Table 1.

Figure S02: Evolution of specific surface area (SSA) of the three series. 
