# Supplementary figures and images for: Vapor flux and recrystallization during dry snow metamorphism under a steady temperature gradient as observed by time-lapse micro-tomography
Source: Copernicus journal article supplement (doi:10.5194/tc-6-1141-2012), 2012-10-16

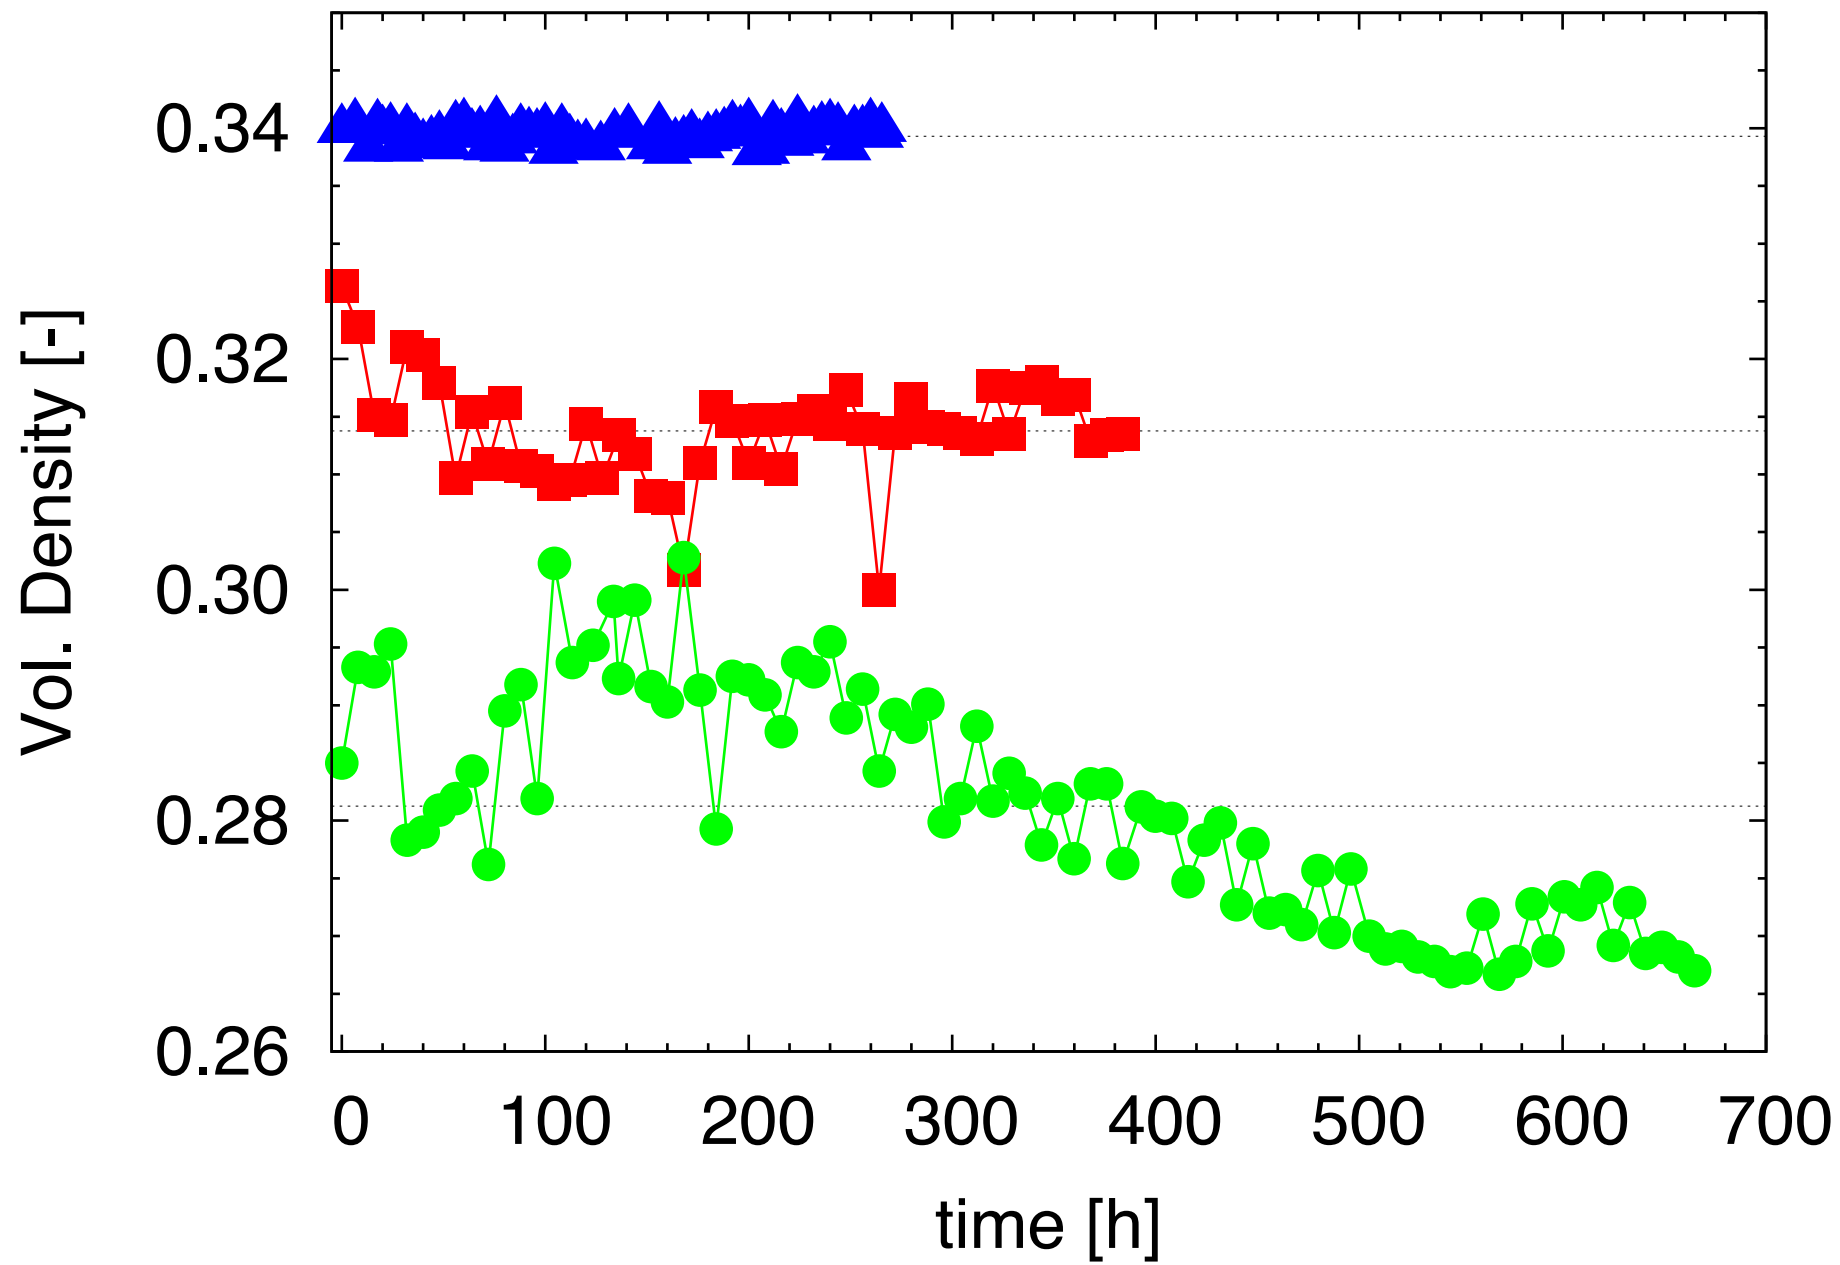

Supplement: Supplementary file 1 [file tc-6-1141-2012-supplement.zip › tcd-2012-0040-fS01.pdf]

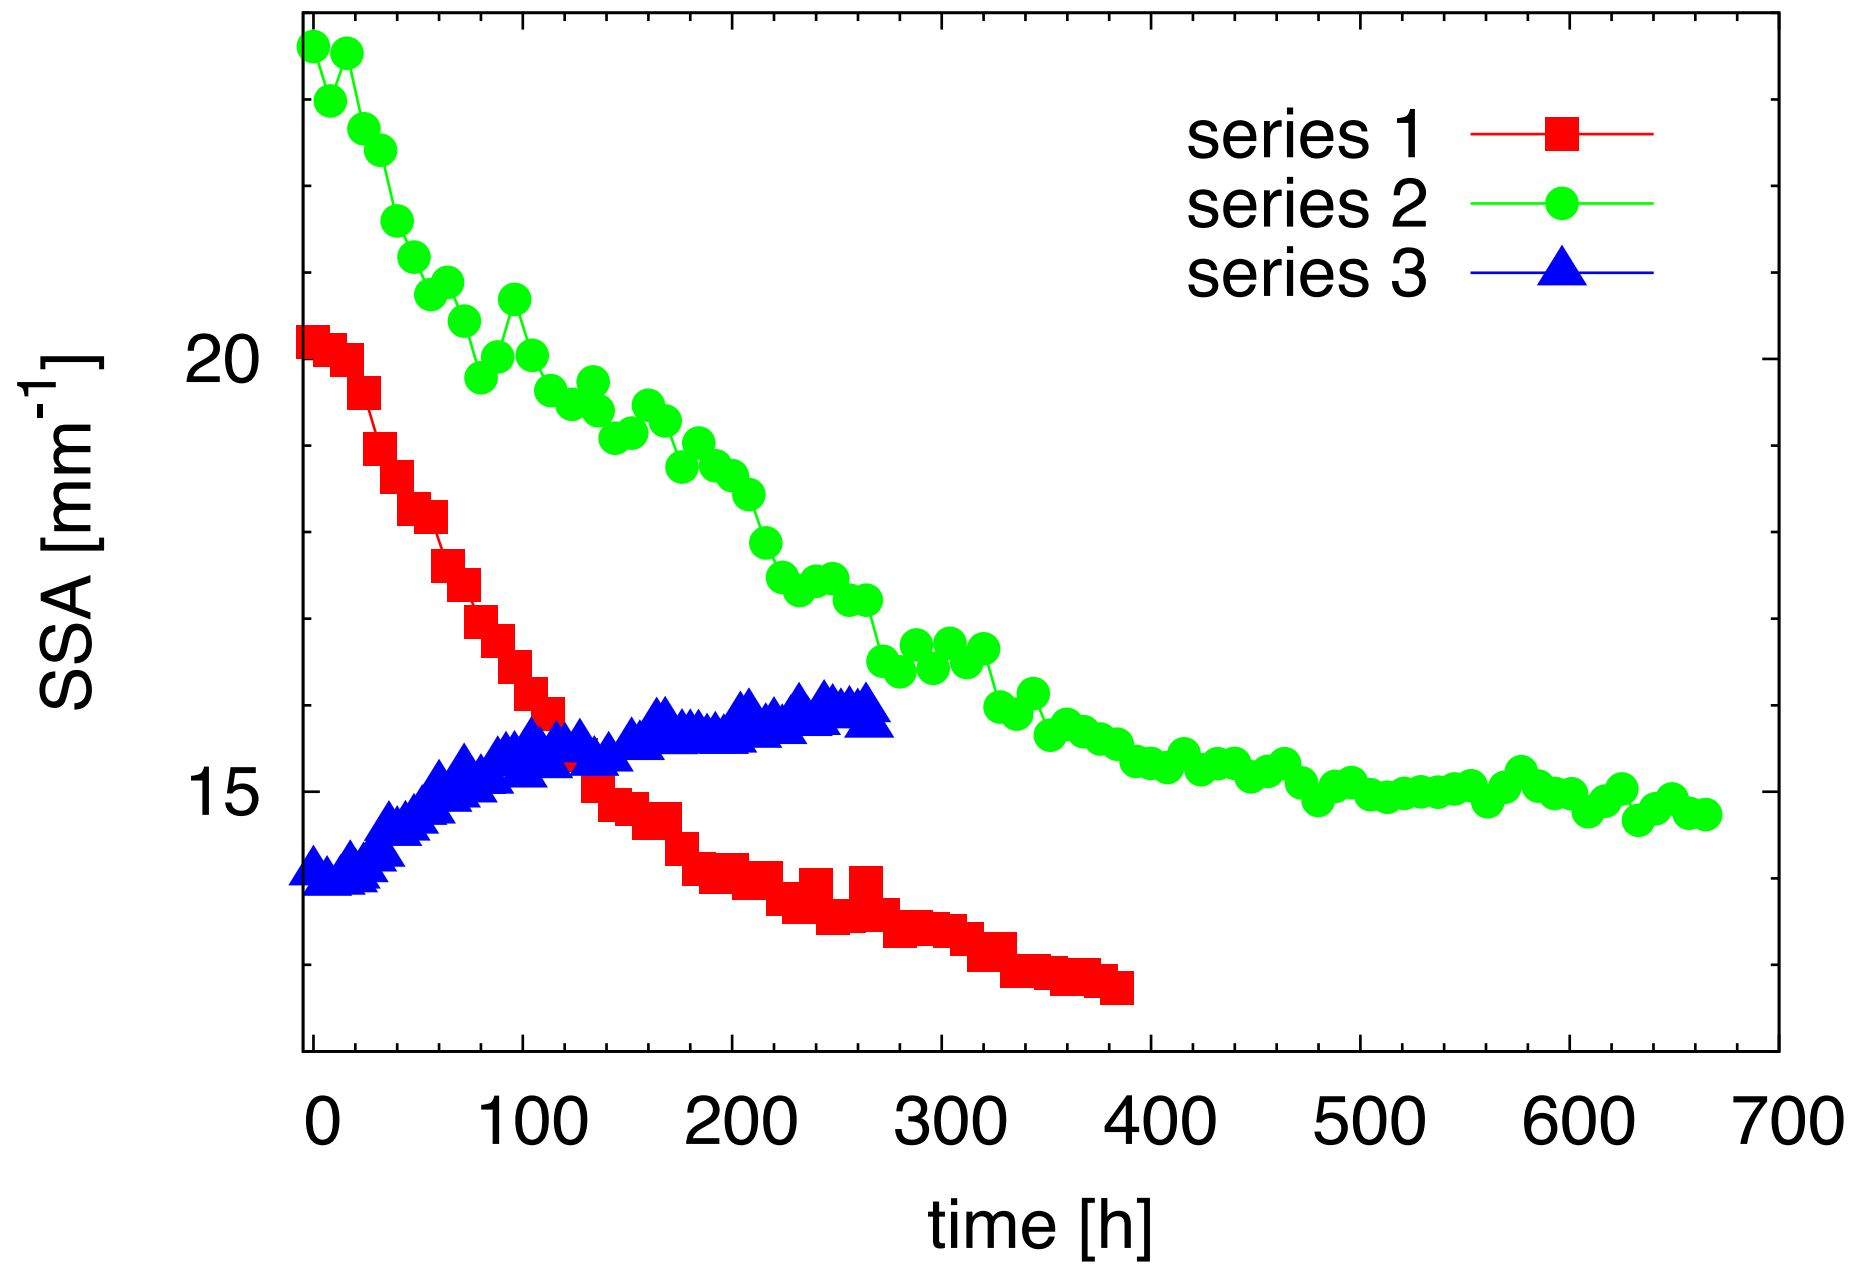

Supplement: Supplementary file 1 [file tc-6-1141-2012-supplement.zip › tcd-2012-0040-fS02.pdf]
